# Supplementary material for: Expression patterns of mismatch repair proteins in cervical cancer uncover independent prognostic value of MSH-2
Source: PubMed Central journal article supplement (PMC11228214; doi:10.1136/ijgc-2024-005377), 2024-07-01
Supplement: ijgc-2024-005377supp001.pdf [file ijgc-2024-005377supp001.pdf]

# Expression patterns of MMR proteins in cervical cancer uncover independent prognostic value of MSH-2

## Supplementary material

Madeleine C. van den Berg<sup>1,2</sup>, MD, Hege F. Berg<sup>1,2</sup>, PhD, Tomasz Stokowy<sup>3</sup>, PhD, Erling A. Hoivik<sup>1,2</sup>, PhD, Kathrine Woie<sup>1</sup>, MD, PhD, Hilde Engerud<sup>1,2</sup>, MD, PhD, Akinyemi I Ojesina<sup>4,5</sup>, MD, PhD, Ingrid S. Haldorsen<sup>6,7</sup>, MD, PhD, Jone Trovik<sup>1,2</sup>, MD, PhD, Bjørn I. Bertelsen<sup>8</sup>, MD, PhD, Camilla Krakstad<sup>1,2</sup>, PhD and Mari Kylesø Halle<sup>1,2, #</sup>, PhD

<sup>1</sup>Department of Obstetrics and Gynaecology, Haukeland University Hospital, Bergen, Norway;

<sup>2</sup>Centre for Cancer Biomarkers, Department of Clinical Science, University of Bergen, 5053 Bergen, Norway.

<sup>3</sup>Scientific Computing Group, IT Division, University of Bergen Norway.

<sup>4</sup>Department of Obstetrics and Gynecology, Medical College of Wisconsin, Milwaukee, WI, USA.

<sup>5</sup>Medical College of Wisconsin Cancer Center, Medical College of Wisconsin, Milwaukee, WI, USA.

<sup>6</sup>Department of Clinical Medicine, University of Bergen, Bergen, Norway.

<sup>7</sup>Mohn Medical Imaging and Visualization Centre, Department of Radiology, Haukeland University Hospital, Bergen, Norway.

<sup>8</sup>Department of Pathology, Haukeland University Hospital, 5021 Bergen, Norway

<sup>#</sup>Corresponding author:

Mari Kylesø Halle: Glasblokkene, Blokk 1, Haukelandsbakken 15, 5009 Bergen; e-mail: [mari.halle@uib.no](mailto:mari.halle@uib.no); phone: +47 99 59 65 97; ORCID: 0000-0002-2660-8271

## Appendix A

### Methods

#### *Patient cohort*

MRIs in this study include T2-weighted sequences acquired and read in two orthogonal planes.

#### *Immunohistochemical staining*

TMA slides were dewaxed in xylene, rehydrated in graded ethanol prior to antigen retrieval in pH 9 (S-2367; Dako Denmark A/S, Glostrup, Denmark) or pH 6 (S-1699 Dako, North America) by boiling for 15 minutes. Endogenous peroxidase activity was blocked (S-2023; Dako Denmark A/S) and sections were stained for 30 min (anti MLH-1, anti MSH-2) or one hour (anti MSH-6, anti PMS-2) at room temperature with primary antibodies

Sections were then stained with horseradish peroxidase-labeled secondary anti-mouse antibody (K-4001; Dako-Denmark A/S) for 30 minutes. Finally, DAB-chromogen (K-4010; Dako Denmark A/S) was applied, the sections were counterstained with hematoxylin and dehydrated in ethanol and xylene before mounting.

#### *Evaluation of scoring*

Sections were scored using the semi-quantitative staining index (SI) method, considering both staining intensity and area of positive staining. Intensity of nuclear staining was scored as 0 = negative, 1 = weak, 2 = moderate or 3 = strong, and area of the staining was scored 0 = 0%, 1 = 1-10%, 2 = 10-50% and 3 > 50% positive staining. The SI was calculated as a product of intensity and area.

#### *Transcriptomic analyses*

GSEAs were performed within the JExpress software applying Golub (signal to noise) as scoring method and by permuting on genes (1000 permutations).

#### *Mutational analyses*

DNA was extracted from snap-frozen tumor tissue by using the AllPrep DNA/RNA Mini kit (Qiagen, Germany) in agreement with the manufacturer's protocol. The libraries were set up using KAPA Hyper Prep (100 ng input) and captured using the SeqCap EZ MedExome

(Roche, Basel, Switzerland). The Illumina HiSeq 4000 (Twist: 100 × 2) was applied for sequencing. Bwa-mem (v.0.7.17) was used to align sequences to the human genome GRCh38, executed using the dockstore-cgpmmap 3.3.0 pipeline. Raw reads quality was assessed using the FASTQC and Picard software (v.2.17.0). The GATK was applied for depth and coverage analyses. MultiQC (was used to generate data quality report and control factors such as duplicate and alignment rate. Total number of sequenced reads, unique reads, covered bases and coverage per base are summarized in Supplementary Table 3). Variant calling procedure included consideration of a 1000 genomes panel of normal samples (suggested by Mutect documentation), calculation of contamination tables and finally filtering using FilterMutectCalls function. From the filtered calls we extracted variants which had “PASS” annotation. Overlap of called variants was limited to exome regions using MedExome hg38 bed files from Roche and ontarged capture with bedtools intersect (version 2.27.1). Variants were annotated using Ensembl VEP following vcf2maf instruction 1.6.21.

## Supplementary figures

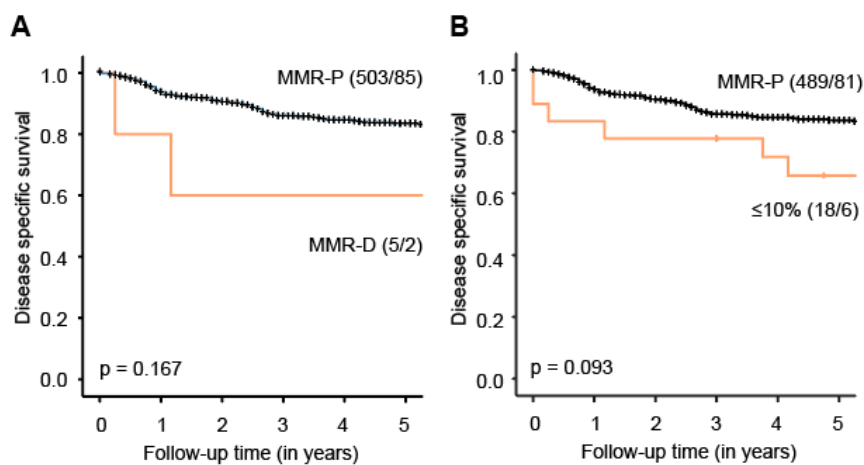

## Supplementary figure 1 - No difference in survival between patients with MMR-deficient versus proficient tumors

**A/B:** Mismatch repair deficiency (MMR-D) did not associate with disease specific survival (A) or  $\leq 10\%$  MMR positive cells (B). P-values are given by log-rank (Mantel-Cox) test. Number in brackets indicates total number of patients/events.

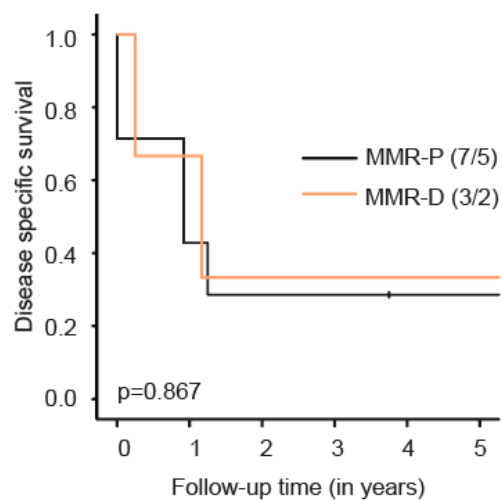

## Supplementary figure 2 - MMR-deficiency is not prognostic within patients with neuroendocrine carcinomas

No difference in survival outcomes were detected between patients with mismatch repair deficient (MMR-D) and mismatch repair proficient (MMR-P) neuroendocrine carcinomas. P-values are given by log-rank (Mantel-Cox) test. Number in brackets indicates total number of patients/number of events.

## Supplementary tables

**Supplementary table 1**– Immunohistochemistry antibody information.

| <b>Primary antibody</b> | <b>Supplier</b>  | <b>Catalogue number</b> | <b>Dilution</b> | <b>Incubation time</b> | <b>HIER buffer</b> |
|-------------------------|------------------|-------------------------|-----------------|------------------------|--------------------|
| <b>MLH-1</b>            | Leica Biosystems | MLH1-L-CE               | 1 : 100         | 30 min                 | pH 9               |
| <b>MSH-6</b>            | Leica Biosystems | MSH6-L-CE               | 1 : 25          | 60 min                 | pH 9               |
| <b>MSH-2</b>            | Leica Biosystems | MSH2-L-CE               | 1 : 50          | 30 min                 | pH 6               |
| <b>PMS-1</b>            | Leica Biosystems | PMS2-L-CE               | 1 : 30          | 60 min                 | pH 9               |

HIER: Heat induced epitope retrieval

**Supplementary table 2** – Cut-off values for the dichotomization of the staining index for the MMR proteins

| <b>Protein</b> | <b>Low<br/>Range staining index (n)</b> | <b>High<br/>Range staining index (n)</b> |
|----------------|-----------------------------------------|------------------------------------------|
| MLH-1          | 0-6 (232)                               | 9 (232)                                  |
| MSH-2          | 0-4 (48)                                | 6-9 (409)                                |
| MSH-6          | 0-6 (175)                               | 9 (287)                                  |
| PMS-2          | 0-3 (177)                               | 4-9 (272)                                |

**Supplementary table 3** – sequencing coverage and quality statistics of the whole exome sequencing

| Sample ID | Total number of sequenced reads | Total number of uniquely mapped non-duplicate reads <sup>a</sup> | Total number of covered bases (Mb) <sup>b</sup> | Median coverage per base <sup>b</sup> | Minimum coverage per base <sup>b</sup> | Maximum coverage per base <sup>b</sup> | Percentage of targeted bases with coverage $\geq 30^{b,c,d}$ |
|-----------|---------------------------------|------------------------------------------------------------------|-------------------------------------------------|---------------------------------------|----------------------------------------|----------------------------------------|--------------------------------------------------------------|
| T_001     | 169600000                       | 110017870                                                        | 11040.4                                         | 117.0                                 | 0                                      | 4773                                   | 99.0%                                                        |
| T_002     | 168000000                       | 110679618                                                        | 11103.0                                         | 115.0                                 | 0                                      | 2632                                   | 99.0%                                                        |
| T_003     | 183000000                       | 118643264                                                        | 11890.7                                         | 125.0                                 | 0                                      | 2694                                   | 99.0%                                                        |
| T_004     | 200000000                       | 127458930                                                        | 12797.0                                         | 134.0                                 | 0                                      | 3175                                   | 99.0%                                                        |
| T_005     | 165000000                       | 108306450                                                        | 10873.3                                         | 116.0                                 | 0                                      | 2615                                   | 99.0%                                                        |
| T_006     | 191600000                       | 123306116                                                        | 12359.3                                         | 129.0                                 | 0                                      | 2383                                   | 99.0%                                                        |
| T_007     | 199200000                       | 126689030                                                        | 12702.1                                         | 134.0                                 | 0                                      | 2955                                   | 99.0%                                                        |
| T_008     | 196400000                       | 123106042                                                        | 12324.4                                         | 129.0                                 | 0                                      | 3112                                   | 99.0%                                                        |
| T_009     | 203800000                       | 130482752                                                        | 13081.0                                         | 138.0                                 | 0                                      | 2446                                   | 99.0%                                                        |
| T_010     | 174400000                       | 113401606                                                        | 11380.7                                         | 121.0                                 | 0                                      | 2683                                   | 99.0%                                                        |
| T_011     | 198800000                       | 127301438                                                        | 12751.2                                         | 137.0                                 | 0                                      | 2866                                   | 99.0%                                                        |
| T_012     | 203400000                       | 129176532                                                        | 12962.0                                         | 140.0                                 | 0                                      | 2988                                   | 99.0%                                                        |
| T_013     | 216600000                       | 136701680                                                        | 13711.4                                         | 147.0                                 | 0                                      | 3085                                   | 99.0%                                                        |
| T_014     | 181800000                       | 120305458                                                        | 12073.3                                         | 129.0                                 | 0                                      | 2836                                   | 99.0%                                                        |
| T_015     | 163200000                       | 107128796                                                        | 10745.5                                         | 115.0                                 | 0                                      | 2800                                   | 99.0%                                                        |
| T_016     | 178200000                       | 113999368                                                        | 11438.6                                         | 122.0                                 | 0                                      | 2738                                   | 99.0%                                                        |
| T_017     | 183600000                       | 124211754                                                        | 12436.7                                         | 127.0                                 | 0                                      | 3595                                   | 99.0%                                                        |
| T_018     | 203400000                       | 134600872                                                        | 13456.6                                         | 142.0                                 | 0                                      | 2822                                   | 99.0%                                                        |
| T_019     | 172600000                       | 116187898                                                        | 11644.5                                         | 122.0                                 | 0                                      | 2664                                   | 99.0%                                                        |
| T_020     | 182200000                       | 120234622                                                        | 12049.2                                         | 127.0                                 | 0                                      | 2352                                   | 99.0%                                                        |
| T_021     | 210200000                       | 136447406                                                        | 13684.9                                         | 139.0                                 | 0                                      | 3025                                   | 99.0%                                                        |
| T_022     | 164600000                       | 111760200                                                        | 11198.7                                         | 117.0                                 | 0                                      | 2985                                   | 99.0%                                                        |
| T_023     | 188600000                       | 126147470                                                        | 12655.4                                         | 133.0                                 | 0                                      | 3324                                   | 99.0%                                                        |
| T_024     | 171800000                       | 117133020                                                        | 11746.8                                         | 123.0                                 | 0                                      | 2403                                   | 99.0%                                                        |
| T_025     | 196600000                       | 134752866                                                        | 13495.8                                         | 143.0                                 | 0                                      | 2965                                   | 99.0%                                                        |
| T_026     | 241200000                       | 154958410                                                        | 15526.1                                         | 161.0                                 | 0                                      | 3509                                   | 99.0%                                                        |
| T_027     | 179600000                       | 124554334                                                        | 12481.0                                         | 128.0                                 | 0                                      | 2505                                   | 99.0%                                                        |
| T_028     | 187400000                       | 127697606                                                        | 12810.2                                         | 133.0                                 | 0                                      | 2879                                   | 99.0%                                                        |
| T_029     | 200400000                       | 138662390                                                        | 13922.2                                         | 147.0                                 | 0                                      | 3358                                   | 99.0%                                                        |
| T_030     | 196000000                       | 134378194                                                        | 13474.7                                         | 132.0                                 | 0                                      | 3769                                   | 99.0%                                                        |
| T_031     | 198200000                       | 135821092                                                        | 13608.9                                         | 138.0                                 | 0                                      | 3225                                   | 99.0%                                                        |
| T_032     | 194200000                       | 134602558                                                        | 13485.1                                         | 140.0                                 | 0                                      | 3165                                   | 99.0%                                                        |
| T_033     | 228600000                       | 144664250                                                        | 14520.3                                         | 152.0                                 | 0                                      | 3923                                   | 99.0%                                                        |
| T_034     | 233200000                       | 148220172                                                        | 14874.9                                         | 158.0                                 | 0                                      | 3388                                   | 99.0%                                                        |
| T_035     | 212000000                       | 135444592                                                        | 13603.7                                         | 143.0                                 | 0                                      | 3198                                   | 99.0%                                                        |
| T_036     | 216600000                       | 139919874                                                        | 14032.1                                         | 148.0                                 | 0                                      | 3288                                   | 99.0%                                                        |
| T_037     | 209600000                       | 134680836                                                        | 13525.4                                         | 143.0                                 | 0                                      | 3408                                   | 99.0%                                                        |

|       |           |           |         |       |   |      |       |
|-------|-----------|-----------|---------|-------|---|------|-------|
| T_038 | 195400000 | 127902098 | 12840.5 | 131.0 | 0 | 2555 | 99.0% |
| T_039 | 236200000 | 144312316 | 14488.3 | 152.0 | 0 | 3519 | 99.0% |
| T_040 | 197000000 | 127271692 | 12776.4 | 136.0 | 0 | 2899 | 99.0% |
| T_041 | 214200000 | 138653710 | 13936.1 | 142.0 | 0 | 3444 | 99.0% |
| T_042 | 229800000 | 149497846 | 15024.0 | 152.0 | 0 | 4242 | 99.0% |
| T_043 | 206800000 | 135137030 | 13574.8 | 136.0 | 0 | 3815 | 99.0% |
| T_044 | 188600000 | 125706200 | 12638.4 | 124.0 | 0 | 2863 | 99.0% |
| T_045 | 198600000 | 133914954 | 13457.3 | 134.0 | 0 | 3240 | 99.0% |
| T_046 | 198200000 | 131075234 | 13173.2 | 136.0 | 0 | 3366 | 99.0% |
| T_047 | 200000000 | 137953264 | 13864.3 | 139.0 | 0 | 3841 | 99.0% |
| T_048 | 220200000 | 140855838 | 14144.6 | 143.0 | 0 | 3548 | 99.0% |
| T_049 | 215400000 | 143900282 | 14450.3 | 137.0 | 0 | 3741 | 99.0% |
| T_050 | 232400000 | 151221634 | 15191.4 | 144.0 | 0 | 3755 | 99.0% |
| T_051 | 194200000 | 132790508 | 13338.7 | 125.0 | 0 | 3259 | 99.0% |
| T_052 | 229600000 | 151089920 | 15167.8 | 141.0 | 0 | 3990 | 99.0% |
| T_053 | 230200000 | 154875352 | 15564.5 | 149.0 | 0 | 4106 | 99.0% |
| T_054 | 230200000 | 147943904 | 14858.0 | 132.0 | 0 | 5514 | 99.0% |
| T_055 | 186400000 | 128148624 | 12861.6 | 121.0 | 0 | 3646 | 99.0% |
| T_056 | 228000000 | 148965838 | 14951.6 | 141.0 | 0 | 3479 | 99.0% |
| T_057 | 222400000 | 150455170 | 15115.3 | 145.0 | 0 | 3261 | 99.0% |
| T_058 | 192800000 | 134842330 | 13560.2 | 130.0 | 0 | 3559 | 99.0% |
| T_059 | 224000000 | 151819424 | 15260.4 | 143.0 | 0 | 3976 | 99.0% |
| T_060 | 220400000 | 145850496 | 14657.0 | 138.0 | 0 | 4061 | 99.0% |
| T_061 | 203800000 | 138659540 | 13941.9 | 131.0 | 0 | 3478 | 99.0% |
| T_062 | 198600000 | 138587462 | 13906.4 | 132.0 | 0 | 3331 | 99.0% |
| T_063 | 201600000 | 137285790 | 13797.0 | 133.0 | 0 | 3833 | 99.0% |
| T_064 | 208200000 | 143024052 | 14370.2 | 137.0 | 0 | 3370 | 99.0% |
| T_065 | 210200000 | 133203104 | 13385.8 | 130.0 | 0 | 3203 | 99.0% |
| T_066 | 222400000 | 141011524 | 14168.1 | 135.0 | 0 | 3911 | 99.0% |
| T_067 | 202600000 | 129025618 | 12969.2 | 128.0 | 0 | 3157 | 99.0% |
| T_068 | 229800000 | 146906172 | 14766.2 | 147.0 | 0 | 3427 | 99.0% |
| T_069 | 210000000 | 136790902 | 13747.1 | 134.0 | 0 | 3452 | 99.0% |
| T_070 | 212600000 | 137222510 | 13775.4 | 136.0 | 0 | 2822 | 99.0% |
| T_071 | 217200000 | 138697614 | 13945.6 | 134.0 | 0 | 2964 | 99.0% |
| T_072 | 204400000 | 131754672 | 13224.7 | 128.0 | 0 | 3495 | 99.0% |
| T_073 | 205000000 | 135307520 | 13588.9 | 134.0 | 0 | 3681 | 99.0% |
| T_074 | 189400000 | 123665818 | 12422.8 | 122.0 | 0 | 3169 | 99.0% |
| T_075 | 201000000 | 134447212 | 13494.1 | 133.0 | 0 | 3680 | 99.0% |
| T_076 | 172400000 | 116111036 | 11659.5 | 114.0 | 0 | 2769 | 99.0% |
| T_077 | 182800000 | 122638820 | 12315.4 | 121.0 | 0 | 2852 | 99.0% |
| T_078 | 179200000 | 119182970 | 11960.0 | 117.0 | 0 | 2719 | 99.0% |
| T_079 | 169400000 | 113793812 | 11432.6 | 110.0 | 0 | 2820 | 99.0% |
| T_080 | 192600000 | 126132452 | 12660.6 | 123.0 | 0 | 2782 | 99.0% |

|       |           |           |         |       |   |      |       |
|-------|-----------|-----------|---------|-------|---|------|-------|
| T_081 | 170800000 | 120428180 | 12066.7 | 121.0 | 0 | 3536 | 99.0% |
| T_082 | 180400000 | 126019104 | 12590.9 | 129.0 | 0 | 3114 | 99.0% |
| T_083 | 162200000 | 114276034 | 11449.0 | 114.0 | 0 | 3801 | 99.0% |
| T_084 | 176400000 | 121996642 | 12221.3 | 123.0 | 0 | 2470 | 99.0% |
| T_085 | 168800000 | 118489876 | 11862.2 | 117.0 | 0 | 3218 | 99.0% |
| T_086 | 199800000 | 135633000 | 13579.2 | 136.0 | 0 | 3576 | 99.0% |
| T_087 | 253600000 | 158775516 | 15905.1 | 156.0 | 0 | 6627 | 99.0% |
| T_088 | 159800000 | 112448938 | 11268.7 | 112.0 | 0 | 2989 | 99.0% |
| T_089 | 218800000 | 143000914 | 14324.1 | 143.0 | 0 | 3533 | 99.0% |
| T_090 | 205000000 | 134447504 | 13474.2 | 133.0 | 0 | 3328 | 99.0% |
| T_091 | 196400000 | 133809434 | 13402.5 | 130.0 | 0 | 3612 | 99.0% |
| T_092 | 188200000 | 128890670 | 12887.7 | 125.0 | 0 | 3136 | 99.0% |
| T_093 | 164000000 | 115805900 | 11591.9 | 115.0 | 0 | 2807 | 99.0% |
| T_094 | 190200000 | 129754692 | 12978.2 | 128.0 | 0 | 4321 | 99.0% |
| T_095 | 176400000 | 121905918 | 12204.1 | 119.0 | 0 | 3607 | 99.0% |
| T_096 | 196800000 | 132049776 | 13215.2 | 131.0 | 0 | 3259 | 99.0% |
| N_001 | 110200000 | 76690606  | 7688.0  | 82.0  | 0 | 2077 | 99.0% |
| N_002 | 98400000  | 70530462  | 7067.0  | 76.0  | 0 | 1860 | 98.0% |
| N_003 | 96600000  | 68545302  | 6868.4  | 72.0  | 0 | 1384 | 99.0% |
| N_004 | 93800000  | 67799408  | 6786.6  | 73.0  | 0 | 1698 | 99.0% |
| N_005 | 127200000 | 85026502  | 8525.8  | 90.0  | 0 | 2325 | 99.0% |
| N_006 | 92200000  | 66514522  | 6663.8  | 71.0  | 0 | 1323 | 99.0% |
| N_007 | 118400000 | 82530358  | 8266.4  | 89.0  | 0 | 2273 | 98.0% |
| N_008 | 103400000 | 73679224  | 7374.9  | 79.0  | 0 | 1971 | 97.0% |
| N_009 | 91600000  | 65722498  | 6583.9  | 69.0  | 0 | 1350 | 99.0% |
| N_010 | 108600000 | 75574066  | 7569.6  | 79.0  | 0 | 1759 | 99.0% |
| N_011 | 113400000 | 81175626  | 8133.7  | 85.0  | 0 | 2211 | 98.0% |
| N_012 | 100000000 | 70092172  | 7017.5  | 75.0  | 0 | 1770 | 99.0% |
| N_013 | 110400000 | 75176846  | 7534.2  | 80.0  | 0 | 1839 | 99.0% |
| N_014 | 112200000 | 78358826  | 7854.8  | 83.0  | 0 | 1906 | 99.0% |
| N_015 | 91000000  | 63545944  | 6368.9  | 67.0  | 0 | 1685 | 99.0% |
| N_016 | 91800000  | 65857092  | 6596.5  | 70.0  | 0 | 1663 | 99.0% |
| N_017 | 87000000  | 62389988  | 6250.1  | 66.0  | 0 | 1547 | 99.0% |
| N_018 | 100600000 | 69545786  | 6973.1  | 74.0  | 0 | 1634 | 99.0% |
| N_019 | 99600000  | 70226170  | 7044.3  | 75.0  | 0 | 1694 | 99.0% |
| N_020 | 97000000  | 69157374  | 6938.6  | 74.0  | 0 | 1460 | 99.0% |
| N_021 | 110800000 | 76755234  | 7695.4  | 81.0  | 0 | 1818 | 99.0% |
| N_022 | 99600000  | 69107514  | 6921.2  | 73.0  | 0 | 1654 | 99.0% |
| N_023 | 96000000  | 67600640  | 6779.7  | 71.0  | 0 | 1674 | 99.0% |
| N_024 | 103800000 | 72976592  | 7318.2  | 76.0  | 0 | 1618 | 99.0% |
| N_025 | 111800000 | 94807756  | 7367.5  | 77.0  | 0 | 2181 | 99.0% |
| N_026 | 94000000  | 79919110  | 8025.0  | 86.0  | 0 | 2093 | 99.0% |
| N_027 | 108400000 | 90379644  | 8233.4  | 88.0  | 0 | 1975 | 99.0% |



|       |           |           |         |       |   |      |       |
|-------|-----------|-----------|---------|-------|---|------|-------|
| N_028 | 85200000  | 72333346  | 7067.5  | 75.0  | 0 | 1501 | 99.0% |
| N_029 | 100000000 | 84119900  | 10069.2 | 106.0 | 0 | 2050 | 99.0% |
| N_030 | 88000000  | 75626602  | 7989.7  | 84.0  | 0 | 1923 | 99.0% |
| N_031 | 89800000  | 76411742  | 7220.4  | 77.0  | 0 | 1833 | 99.0% |
| N_032 | 85200000  | 72704462  | 8214.2  | 87.0  | 0 | 1686 | 99.0% |
| N_033 | 102600000 | 73471438  | 9152.0  | 93.0  | 0 | 1627 | 99.0% |
| N_034 | 115400000 | 80027658  | 9446.0  | 96.0  | 0 | 1909 | 99.0% |
| N_035 | 121000000 | 82073610  | 10143.9 | 104.0 | 0 | 2042 | 99.0% |
| N_036 | 99600000  | 70473708  | 9564.3  | 98.0  | 0 | 1709 | 99.0% |
| N_037 | 153400000 | 100333288 | 8736.7  | 89.0  | 0 | 2575 | 99.0% |
| N_038 | 114400000 | 79662948  | 8390.8  | 87.0  | 0 | 1877 | 99.0% |
| N_039 | 101200000 | 71968384  | 7971.6  | 82.0  | 0 | 1769 | 99.0% |
| N_040 | 120400000 | 81830532  | 9206.5  | 94.0  | 0 | 1933 | 99.0% |
| N_041 | 134000000 | 91081266  | 7602.9  | 76.0  | 0 | 2328 | 99.0% |
| N_042 | 138000000 | 93996252  | 7225.9  | 72.0  | 0 | 2520 | 99.0% |
| N_043 | 154600000 | 100914114 | 7768.1  | 77.0  | 0 | 2403 | 99.0% |
| N_044 | 140600000 | 95170456  | 7855.7  | 77.0  | 0 | 2292 | 99.0% |
| N_045 | 127200000 | 86975448  | 8774.5  | 88.0  | 0 | 1988 | 99.0% |
| N_046 | 116400000 | 83567574  | 8183.3  | 81.0  | 0 | 2001 | 99.0% |
| N_047 | 111000000 | 79298270  | 7533.8  | 75.0  | 0 | 1817 | 99.0% |
| N_048 | 133000000 | 91621982  | 7997.0  | 80.0  | 0 | 2377 | 99.0% |
| N_049 | 108800000 | 91529320  | 8628.7  | 85.0  | 0 | 2373 | 99.0% |
| N_050 | 101800000 | 85892198  | 8441.9  | 83.0  | 0 | 2067 | 99.0% |
| N_051 | 114600000 | 95458088  | 9656.8  | 96.0  | 0 | 2454 | 99.0% |
| N_052 | 110800000 | 93078508  | 8959.2  | 89.0  | 0 | 2080 | 99.0% |
| N_053 | 88600000  | 75664626  | 8927.1  | 88.0  | 0 | 1788 | 99.0% |
| N_054 | 106200000 | 89523476  | 9465.8  | 94.0  | 0 | 1928 | 99.0% |
| N_055 | 84400000  | 72372718  | 7219.5  | 71.0  | 0 | 1701 | 99.0% |
| N_056 | 94200000  | 80227240  | 8538.3  | 84.0  | 0 | 2224 | 99.0% |
| N_057 | 92800000  | 79688898  | 9476.0  | 99.0  | 0 | 1736 | 99.0% |
| N_058 | 97600000  | 82872738  | 7987.6  | 84.0  | 0 | 2076 | 99.0% |
| N_059 | 112200000 | 94508806  | 9035.8  | 96.0  | 0 | 2292 | 99.0% |
| N_060 | 119800000 | 99865990  | 7249.2  | 76.0  | 0 | 2490 | 99.0% |
| N_061 | 110600000 | 91512622  | 8418.9  | 89.0  | 0 | 2415 | 99.0% |
| N_062 | 85400000  | 73428638  | 7573.6  | 79.0  | 0 | 1912 | 99.0% |
| N_063 | 109400000 | 91479158  | 7641.4  | 81.0  | 0 | 2402 | 99.0% |
| N_064 | 89200000  | 76276228  | 7263.2  | 77.0  | 0 | 1720 | 99.0% |
| N_065 | 104600000 | 75727686  | 9174.2  | 94.0  | 0 | 1883 | 99.0% |
| N_066 | 101000000 | 71991364  | 8607.1  | 87.0  | 0 | 1891 | 99.0% |
| N_067 | 109000000 | 77367076  | 9561.6  | 98.0  | 0 | 1876 | 99.0% |
| N_068 | 111200000 | 78217332  | 9325.0  | 95.0  | 0 | 1799 | 99.0% |
| N_069 | 129400000 | 87364950  | 7585.8  | 77.0  | 0 | 2196 | 99.0% |
| N_070 | 116200000 | 81610044  | 8972.8  | 90.0  | 0 | 1933 | 99.0% |

|       |           |          |         |      |   |      |       |
|-------|-----------|----------|---------|------|---|------|-------|
| N_071 | 105800000 | 75028444 | 7250.2  | 74.0 | 0 | 1772 | 99.0% |
| N_072 | 112400000 | 79687240 | 8036.1  | 81.0 | 0 | 2062 | 99.0% |
| N_073 | 123200000 | 85907714 | 7985.4  | 75.0 | 0 | 2206 | 99.0% |
| N_074 | 119000000 | 84053078 | 8306.0  | 79.0 | 0 | 2095 | 99.0% |
| N_075 | 139600000 | 96152396 | 9469.9  | 90.0 | 0 | 2456 | 99.0% |
| N_076 | 131600000 | 89221870 | 10005.3 | 96.0 | 0 | 2286 | 99.0% |
| N_077 | 127600000 | 88927116 | 9174.2  | 87.0 | 0 | 2070 | 99.0% |
| N_078 | 136600000 | 94340742 | 7352.3  | 70.0 | 0 | 2410 | 98.0% |
| N_079 | 100800000 | 71907044 | 9169.3  | 85.0 | 0 | 1743 | 99.0% |
| N_080 | 124400000 | 85078162 | 7642.9  | 72.0 | 0 | 2025 | 99.0% |
| N_081 | 99200000  | 84385714 | 8447.7  | 85.0 | 0 | 2027 | 99.0% |
| N_082 | 115800000 | 96872590 | 9680.4  | 99.0 | 0 | 2307 | 99.0% |
| N_083 | 114000000 | 96598268 | 9676.8  | 97.0 | 0 | 2392 | 99.0% |
| N_084 | 110200000 | 93180314 | 9329.3  | 94.0 | 0 | 1979 | 99.0% |
| N_085 | 104400000 | 88409020 | 8848.6  | 88.0 | 0 | 2103 | 99.0% |
| N_086 | 85600000  | 72936470 | 7305.2  | 74.0 | 0 | 1872 | 99.0% |
| N_087 | 106000000 | 90173836 | 9030.6  | 90.0 | 0 | 2232 | 99.0% |
| N_088 | 109800000 | 92587178 | 9279.5  | 94.0 | 0 | 2197 | 99.0% |
| N_089 | 104000000 | 86378168 | 8638.3  | 87.0 | 0 | 2226 | 99.0% |
| N_090 | 104200000 | 87480814 | 8741.4  | 88.0 | 0 | 2209 | 99.0% |
| N_091 | 102600000 | 85605428 | 8558.1  | 86.0 | 0 | 2246 | 99.0% |
| N_092 | 113800000 | 94820612 | 9475.8  | 95.0 | 0 | 2452 | 99.0% |
| N_093 | 80000000  | 69006124 | 6893.6  | 69.0 | 0 | 1676 | 98.0% |
| N_094 | 94400000  | 79796840 | 7967.8  | 80.0 | 0 | 2383 | 99.0% |
| N_095 | 94000000  | 79430004 | 7933.6  | 80.0 | 0 | 2176 | 99.0% |
| N_096 | 88000000  | 75044702 | 7497.4  | 76.0 | 0 | 1744 | 99.0% |

**Supplementary table 4** –MMR deficiency detected in a population based Norwegian cervical cancer patient cohort (total n=5)

| Case             | Age | Histological type | FIGO-18 stage | Last status (months follow-up) | MLH-1 SI | PMS-2 SI | MSH-2 SI | MSH-6 SI |
|------------------|-----|-------------------|---------------|--------------------------------|----------|----------|----------|----------|
| <i>Patient 1</i> | 62  | NEC               | IV            | Dead from disease (3)          | 0        | 0        | 4        | 6        |
| <i>Patient 2</i> | 42  | NEC               | I             | Alive (125)                    | 0        | 0        | 4        | 9        |
| <i>Patient 3</i> | 48  | NEC               | III           | Dead from disease (14)         | 0*       | 0*       | 6*       | 6*       |
| <i>Patient 4</i> | 57  | SCC               | IV            | Alive (92)                     | 2        | 0        | 1        | 6        |
| <i>Patient 5</i> | 48  | SCC               | I             | Alive (174)                    | 2        | 0        | 6        | 6        |

FIGO: International Federation of Gynecology and Obstetrics. SI: staining index, NEC: neuroendocrine carcinoma, SCC: squamous cell carcinoma, ASC: adenosquamous cell carcinoma.

\* TMA score

**Supplementary table 5** – Clinicopathological characteristics for patients with neuroendocrine carcinomas according to MMR deficiency.

| <b>Variables (n)</b>               | <b>MMR-P<br/>(n= 7)</b> | <b>MMR-D<br/>(n= 3)</b> | <b>p-value <sup>a</sup></b> |
|------------------------------------|-------------------------|-------------------------|-----------------------------|
| <i>Median age (10)</i>             |                         |                         | 0.500                       |
| < 45 years                         | 4 (57)                  | 1 (33)                  |                             |
| ≥ 45 years                         | 3 (43)                  | 2 (67)                  |                             |
| <i>FIGO-18 stage (10)</i>          |                         |                         |                             |
| I-IB1                              | 2 (20)                  | 2 (20)                  |                             |
| IB2-IV                             | 8 (80)                  | 8 (80)                  |                             |
| <i>Max tumour diameter (7)</i>     |                         |                         | 1.000                       |
| ≤ 4 cm                             | 2 (40)                  | 1 (50)                  |                             |
| > 4 cm                             | 3 (60)                  | 1 (50)                  |                             |
| <i>Depth of invasion (5)</i>       |                         |                         | 1.000                       |
| Low (≤ 7 mm)                       | 1 (33)                  | 1 (50)                  |                             |
| High (> 7 mm)                      | 2 (67)                  | 1 (50)                  |                             |
| <i>Inflammatory reaction (9)</i>   |                         |                         | 0.635 <sup>b</sup>          |
| No                                 | 3 (50)                  | 2 (67)                  |                             |
| Intermediate                       | 3 (50)                  | 1 (33)                  |                             |
| Strong                             | 0 (0)                   | 0 (0)                   |                             |
| <i>Vascular space invasion (8)</i> |                         |                         | 1.000                       |
| No                                 | 3 (75)                  | 1 (50)                  |                             |
| Yes                                | 1 (25)                  | 1 (50)                  |                             |

pMMR: proficient MMR, dMMR: deficient MMR. FIGO: Fédération Internationale de Gynécologie et d'Obstétrique. <sup>a</sup> Fisher exact, <sup>b</sup> chi-square.

**Supplementary table 6** - Clinicopathological characteristics for patients with MSH-2 high vs low tumors.

| Variables (n)                          | MSH-2 Low (n= 48)<br>n (%) | MSH-2 High (n= 410)<br>n (%) | p-value <sup>a</sup> |
|----------------------------------------|----------------------------|------------------------------|----------------------|
| <i>Median age (458)</i>                |                            |                              | 0.585                |
| < 45 years                             | 22 (46)                    | 205 (50)                     |                      |
| ≥ 45 years                             | 26 (54)                    | 205 (50)                     |                      |
| <i>FIGO-18 stage (458)</i>             |                            |                              | 0.937                |
| I-IB1                                  | 16 (33)                    | 139 (34)                     |                      |
| IB2-IV                                 | 32 (67)                    | 271 (66)                     |                      |
| <i>Max tumor diameter in MRI (243)</i> |                            |                              | 0.587                |
| ≤ 4 cm                                 | 12 (55)                    | 134 (61)                     |                      |
| > 4 cm                                 | 10 (45)                    | 87 (39)                      |                      |
| <i>Histologic type (458)</i>           |                            |                              | 0.083                |
| Squamous cell carcinoma                | 35 (73)                    | 306 (75)                     |                      |
| Adenocarcinoma                         | 7 (15)                     | 79 (19)                      |                      |
| Adenosquamous carcinoma                | 4 (8)                      | 10 (2)                       |                      |
| Neuroendocrine carcinoma               | 2 (4)                      | 6 (2)                        |                      |
| Undifferentiated                       | 0 (0)                      | 9 (2)                        |                      |
| <i>Grade (452)</i>                     |                            |                              | 0.876                |
| Grade 1/2                              | 42 (88)                    | 350 (87)                     |                      |
| Grade 3                                | 6 (12)                     | 54 (13)                      |                      |
| <i>BMI (452)</i>                       |                            |                              | 0.648                |
| ≤ 25                                   | 24 (9.8)                   | 221 (55)                     |                      |
| > 25                                   | 23 (11.1)                  | 184 (45)                     |                      |
| <i>Inflammatory reaction (442)</i>     |                            |                              | 0.425                |
| No                                     | 8 (18)                     | 59 (15)                      |                      |
| Intermediate                           | 35 (78)                    | 297 (75)                     |                      |
| Strong                                 | 2 (4)                      | 41 (10)                      |                      |
| <i>Vascular space invasion (333)</i>   |                            |                              | 0.838                |
| No                                     | 28 (68)                    | 204 (70)                     |                      |
| Yes                                    | 13 (32)                    | 88 (30)                      |                      |
| <i>P53 status (253)</i>                |                            |                              | 0.005                |
| Integral                               | 19 (54)                    | 154 (71)                     |                      |
| Negative                               | 9 (26)                     | 17 (8)                       |                      |
| High                                   | 7 (20)                     | 47 (21)                      |                      |

The number of cases in each group is given followed by percentage for each column in parenthesis.

FIGO: Fédération Internationale de Gynécologie et d'Obstétrique. BMI: body mass index

<sup>a</sup> Chi-square

**Supplementary table 7** – List of top-20 enriched genesets in MSH-2 low tumors in C5 and 11 enriched genesets in Hallmarks

| Gene Set                                         | Size | ES   | NES  | Non pvalue | FDR (%) |
|--------------------------------------------------|------|------|------|------------|---------|
| <b>c5</b>                                        |      |      |      |            |         |
| GO_CORNIFICATION                                 | 110  | 0,61 | 3,19 | 0          | 0       |
| GO_RESPONSE_TO_TYPE_I_INTERFERON                 | 92   | 0,63 | 3,07 | 0          | 0       |
| GO_T_CELL_ACTIVATION_INVOLVED_IN_IMMUNE_RESPONSE | 98   | 0,58 | 2,97 | 0          | 0       |
| GO_MHC_PROTEIN_COMPLEX                           | 21   | 0,84 | 2,96 | 0          | 0       |
| GO_ADAPTIVE_IMMUNE_RESPONSE                      | 376  | 0,49 | 2,95 | 0          | 0       |
| GO GRANULOCYTE MIGRATION                         | 126  | 0,55 | 2,93 | 0          | 0       |
| GO_ANTIGEN_BINDING                               | 53   | 0,64 | 2,92 | 0          | 0       |
| GO_CCR_CHEMOKINE_RECEPTOR_BINDING                | 37   | 0,71 | 2,92 | 0          | 0       |
| GO_NEUTROPHIL_MIGRATION                          | 105  | 0,57 | 2,92 | 0          | 0       |
| GO_CYTOKINE_SECRETION                            | 207  | 0,51 | 2,91 | 0          | 0       |
| GO_CHEMOKINE_RECEPTOR_BINDING                    | 59   | 0,62 | 2,9  | 0          | 0       |
| GO_TYPE_2_IMMUNE_RESPONSE                        | 35   | 0,7  | 2,9  | 0          | 0       |
| GO_REGULATION_OF_CELL_KILLING                    | 88   | 0,58 | 2,89 | 0          | 0       |
| GO_INTERFERON_GAMMA_MEDIATED_SIGNALING_PATHWAY   | 84   | 0,56 | 2,82 | 0          | 0       |
| GO_RESPONSE_TO_INTERFERON_GAMMA                  | 186  | 0,5  | 2,82 | 0          | 0       |
| GO_INTERLEUKIN_1_BETA_SECRETION                  | 48   | 0,64 | 2,81 | 0          | 0       |
| GO_RESPONSE_TO_PROTOZOAN                         | 18   | 0,82 | 2,79 | 0          | 0       |
| GO_LYMPHOCYTE_CHEMOTAXIS                         | 56   | 0,61 | 2,78 | 0          | 0       |
| GO_INTERLEUKIN_1_BETA_PRODUCTION                 | 77   | 0,58 | 2,78 | 0          | 0       |
| GO_POSITIVE_REGULATION_OF_CYTOKINE_SECRETION     | 126  | 0,52 | 2,78 | 0          | 0       |
| <b>Hallmarks</b>                                 |      |      |      |            |         |
| HALLMARK_INTERFERON_ALPHA_RESPONSE               | 92   | 0,71 | 3,57 | 0          | 0       |
| HALLMARK_INTERFERON_GAMMA_RESPONSE               | 195  | 0,63 | 3,55 | 0          | 0       |
| HALLMARK_ALLOGRAFT_REJECTION                     | 199  | 0,58 | 3,33 | 0          | 0       |
| HALLMARK_INFLAMMATORY_RESPONSE                   | 195  | 0,54 | 3,11 | 0          | 0       |
| HALLMARK_TNFA_SIGNALING_VIA_NFKB                 | 195  | 0,51 | 2,9  | 0          | 0       |
| HALLMARK_IL6_JAK_STAT3_SIGNALING                 | 85   | 0,56 | 2,76 | 0          | 0       |
| HALLMARK_COMPLEMENT                              | 193  | 0,35 | 1,95 | 0          | 0,04    |
| HALLMARK_COAGULATION                             | 133  | 0,33 | 1,81 | 0          | 0,11    |
| HALLMARK_KRAS_SIGNALING_UP                       | 190  | 0,32 | 1,81 | 0          | 0,1     |
| HALLMARK_IL2_STAT5_SIGNALING                     | 194  | 0,3  | 1,68 | 0          | 0,38    |
| HALLMARK_P53_PATHWAY                             | 194  | 0,28 | 1,55 | 0          | 0,83    |
